# Supplementary material
Source: publisher site journal article supplement (https://www.dovepress.com/article/446212)
Supplement: Supplementary file 1 [file get_supplementary_file.php]

Supplementary file

**Development of SERS active Nanoprobe for Selective Adsorption and Detection of Alzheimer’s Disease Biomarkers Based on Molecular Docking**

Umesh Chandra Garnaik1

Anshuman Chandra1

Vijay Kumar Goel1

Balazs Gulyas2

Parasuraman Padmanabhan2*

Shilpi Agarwal1*

1 School of Physical Sciences, Jawaharlal Nehru University, New Delhi, India;

2Cognitive Neuroimaging Centre, Nanyang Technological University (NTU), Singapore, Singapore

**Supplementary Figure 1 - The molecular docking study of Raman RB-AuNPs nanoprobe binding to Tau protein**

Figure SF-1 shows the molecular docking analysis of Rose Bengal (RB) to Tau protein has provided insights into their binding affinity as shown in supplementry figure 1 and supplementary figure 2. The calculated binding The binding affinity in which binding scores for RB is -6 kcal/mol. The existence of halogen bonding and many hydrophobic contacts highlights the selectivity and strength of RB's binding to Tau protein.


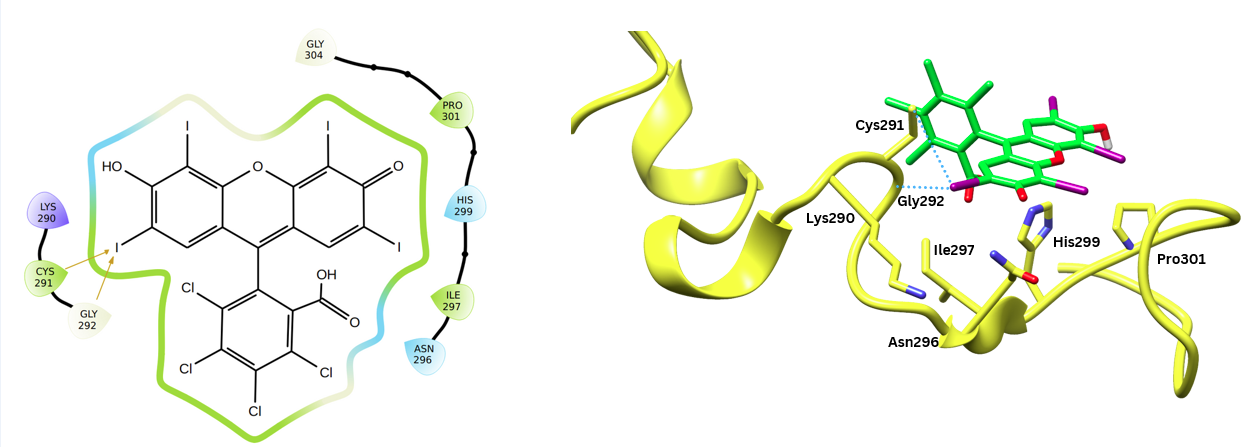


**Figure SF-1:** Molecular docking structures of Tau protein conjugation with RB molecules in 2D and 3D.

**Supplementary Figure 2 - The molecular docking study of Raman CC-AgNPs nanoprobe binding to Tau protein**

Molecular docking analysis of Pinacyanol Iodide binding to Tau protein in the figure SF-2 provides binding affinity with binding scores for Pinacyanol Iodide is -5.7 kcal/mol. The Pinacyanol Iodide-Tau combination demonstrates a salt bridge interaction, which improves overall stability. The findings significantly support the significant affinity of Pinacyanol Iodide for Tau protein.


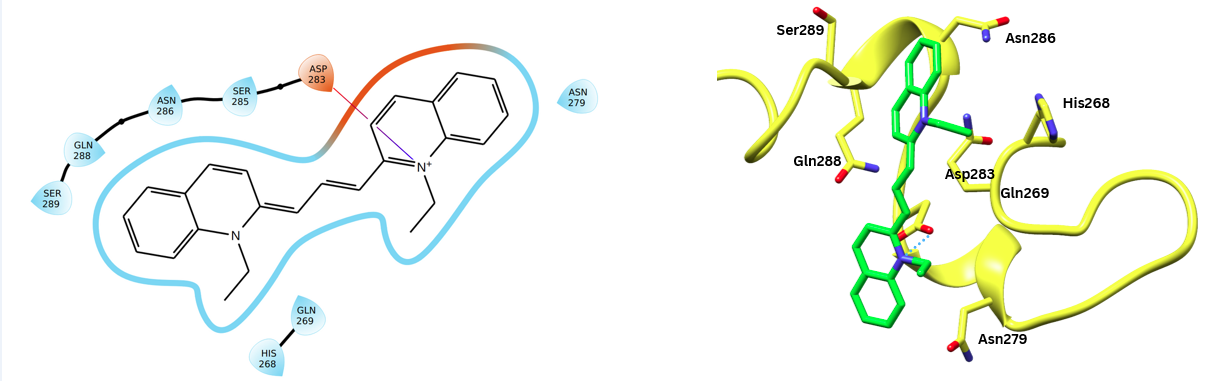


**Figure SF-2:** Molecular docking structures of Tau protein conjugation with CC molecules in 2D and 3D.

**Supplementary Table 1: Comparison of recent studies on the detection Aβ 42 as a biomarker for AD diagnosis.**

Aggregated Aβ plaques accumulate inside the brain due to impaired Aβ clearance or excessive production. This happens around 20 years before the start of cognitive impairment. They can be discovered 10-15 years before the beginning of symptoms. The detection of aggregated Aβ 42 is a major focus in recent times for early diagnosis of AD. Here we have compared some recent methods used to detect Aβ 42 for diagnosis of AD with our method to provide significance of our results (Table 1).

**Table ST-1:** Comparison of recent studies on the detection Aβ 42 as a biomarker for AD diagnosis.

| **Methods of Aβ 42 Detection** | **Key Points** |
| --- | --- |
| Detecting Amyloid β Oligomers 42 with Copper-Enhanced Gold Immunoblotting on a Multi-Chamber Paper Platform.1 | According to this work, multichambered paper devices were manufactured using the wax printing process and used to detect Aβ 42 oligomers by copper-enhanced gold nanoprobe colorimetric immunoblotting. Compared with the above study our nanoprobe (RB-AuNPs and CC-AgNPs) is a simple approach for collecting biological fluids such as blood, sweat, and saliva from patients. When these fluids conjugated with nanoprobes, it undergoes chemical modifications that detect the presence of Aβ 42 without using peptide antibodies. |
| A smart optical assay for quantifying β-Amyloid peptides using multilayered bioorthogonal SERS nanoprobes that selectively aggregate in human fluids.2 | A multilayered nanoprobe with bioorthogonal Raman reporters (RRs) embedded inside two layers of gold nanoparticles (Au@RRs@AuNPs) was designed and effectively validated for selective detection of Aβ (1-42) in the human CSF with sensitivity down to pg/mL. CSF collection takes time and poses a danger to patients. According to the study, Aβ 42 oligomers were collected in the brain. As a result, the amount of Aβ 42 in other body fluids is decreased in AD patients. Our study aims to detect Aβ 42 at concentrations of 2µg/ml, which are feasible in perspiration, saliva, and blood. |
| Fluorescent peptide nanoparticles may identify Aβ aggregation in CSF and serum to diagnose and monitor Alzheimer's disease development.3 | Researchers used fluorescent cyclic peptide nanoparticles (c-PNPs) to detect Aβ aggregates in CSF and serum samples from healthy individuals and Alzheimer's patients at various stages of the illness. In our technique, we use a bifunctional fluorescent/Raman nanoprobe to detect Aβ 42. In addition to this experimental study, we have also validated that the Aβ aggregates following interaction with arginine and tyrosine were examined using molecular docking analysis. |
| Using All-Atom Molecular Dynamics, investigation of how Au Nanoparticles inhibit the aggregation of Amyloid-β (16-22) Peptides at the atomic level.4 | Here adding AuNPs to Aβ (16-22) solution inhibits β-sheet formation, which is dependent on the concentration of Aβ (16-22) peptides. The study analyzed the architectures of Aβ (16-22) peptides at varied concentrations in the presence and absence of AuNPs. This provides theoretical insights for developing therapeutic candidates for Alzheimer's disease. Our study signifies the Aβ 42 as a biomarker considering its full polypeptide chain (1-42) and the author also studied nanoprobe application on mice model in their previous study.44 |

References:

1. Phan LM, Cho S. A Multi-Chamber Paper-Based Platform for the Detection of Amyloid β Oligomers 42 via Copper-Enhanced Gold Immunoblotting. *Biomolecules* 2021;11(7):948.
2. Caterina D, Elena L, Andrea T, Valentina B, Silvia B, Benedetta N, Caterina C,Francesco SP. Multilayered Bioorthogonal SERS Nanoprobes Selectively Aggregating in Human Fluids: A Smart Optical Assay for β-Amyloid Peptide Quantification. *ACS Sensors* 2023;8 (10):3693-3700.
3. Leming S, Dingchang L, Dongjie F, Tao Y, Douglas S, Lianbing Z. Fluorescent peptide nanoparticles to detect amyloid-beta aggregation in cerebrospinal fluid and serum for Alzheimer’s disease diagnosis and progression monitoring *Chemical Engineering Journal*, 2021; 405: 126733.
4. Song M, Sun Y, Luo Y, Zhu Y, Liu Y, Li H. Exploring the Mechanism of Inhibition of Au Nanoparticles on the Aggregation of Amyloid-β (16-22) Peptides at the Atom Level by All-Atom Molecular Dynamics. *Int J Mol Sci.* 2018;19(6):1815.
